# Supplementary material for: Neurodegeneration and Unfolded-Protein Response in Mice Expressing a Membrane-Tethered Flexible Tail of PrP
Source: PubMed Central journal article supplement (PMC4319788; doi:10.1371/journal.pone.0117412), 2015-02-06
Supplement: pone.0117412.s009.pdf [file pone.0117412.s009.pdf]

### FTgpi is inherited as an autosomal trait at Mendelian frequency

| Chi-square test (ratio 1:1) | Observed value | Expected value | $\chi^2$ |
|-----------------------------|----------------|----------------|----------|
| FTgpi +                     | 14             | 13             | 0.08     |
| FTgpi -                     | 12             | 13             | 0.08     |
| Total                       | 26             | 26             | 0.15     |

Degrees of Freedom: 1.  $H_0: FTgpi+ = FTgpi-$   $\chi^2_{0.15} p=0.7 > \chi^2_{3.84} p =0.05$  The observed  $\chi^2$  is not significantly different from the expected value, confirming the null hypothesis. The observed numbers are consistent with those expected under Mendel's law.
