# Supplementary material for: Neurodegeneration and Unfolded-Protein Response in Mice Expressing a Membrane-Tethered Flexible Tail of PrP
Source: PubMed Central journal article supplement (PMC4319788; doi:10.1371/journal.pone.0117412), 2015-02-06
Supplement: pone.0117412.s010.pdf [file pone.0117412.s010.pdf]

### **Clinical scoring and observation**

For clinical assessment: the mice will be observed once a week after weaning for clinical signs which might include one or more of the following: weight loss, hunched posture, rough hair coat, limb paresis, ataxia, or decreased activity. Once the mice have been scored grade 2 they will be observed more frequently as described below. Mice will be euthanized if they have grade 3.5 and more for > 4 days, as described below.

| Score | clinic                                                                | assessment                                              | action                                                     |
|-------|-----------------------------------------------------------------------|---------------------------------------------------------|------------------------------------------------------------|
| 0.00  | no detectable signs of abnormal movement                              |                                                         |                                                            |
| 1.00  | limp tail and hind limb weakness                                      | (occasional grid test positive)                         | provide food in the cage                                   |
| 2.00  | unilateral partial hind limb paralysis                                | one leg consistently falls through the grid (cage test) | provide food and water in the cage<br>observe twice a week |
| 2.50  | bilateral partial hind limb paralysis                                 | cage grit test bilateral                                | observe every second day                                   |
| 3.00  | complete bilateral hind limb paralysis                                |                                                         | observe daily;<br>sacrifice if persistent > 7 days         |
| 3.50  | complete bilateral hind limb paralysis and partial forelimb paralysis |                                                         | sacrifice if persistent > 4 days                           |
| 4.00  | moribund (mouse completely paralyzed)                                 |                                                         | sacrifice immediately                                      |
| 5.00  | dead                                                                  |                                                         |                                                            |

-
